# Supplementary material
Source: HighWire-hosted journal article supplement (https://jnm.snmjournals.org/highwire/filestream/94724/field_highwire_adjunct_files/0/158873_Supplemental_Data.pdf)
Supplement: 158873_Supplemental_Data.pdf [file 158873_Supplemental_Data.pdf]

### *Preparation of QD-RGD-BBN*

QD-RGD-BBN, purchased from APeptide Co., Ltd (Shanghai, China), was synthesized from conjugation of peptide heterodimer BocNH-PEG<sub>3</sub>-(SuO)-beta-Glu-RGD-BBN with QD-705 and deprotection of Boc (t-butyloxycarbonyl-) group with trifluoroacetic acid (TFA) as shown in Fig 1B. The peptide heterodimer BocNH-PEG<sub>3</sub>-(SuO)-beta-Glu-BBN-RGD-Resin was synthesized stepwise by solid-phase peptide synthesis strategy as described in Supplemental Fig. 1. In brief, loading of Fmoc-Asp(Oallyl)-resin, synthesis of the cyclo(Arg-Gly-Asp-D-Tyr-Lys) (RGD) peptide follows standard peptide synthesis protocols. The  $\beta$ -carboxylate was activated and coupled with cyclic RGD peptide via the lysine side chain  $\epsilon$ -amine group. After removing the -Dde protected group from  $\beta$ -Glu, the heterodimer peptide Fmoc-beta-Glu-BBN(7-14)-beta-Glu\*-cyclo(Arg-Gly-Asp-D-Tyr-Lys)-Resin (Fmoc-beta-Glu-BBN-RGD-Resin) was obtained, which indicates the amino acid that links the RGD and BBN peptides and has a NH<sub>2</sub> group for Fmoc-Glu-OH conjugation, RGD was coupled to the glutamate  $\beta$ -carboxylate group and BBN was coupled to the glutamate another  $\beta$ -carboxylate group. BocNH-PEG<sub>3</sub>-(SuO)-beta-Glu-RGD-BBN was prepared from removing -Fmoc group of Fmoc-beta-Glu-BBN-RGD-Resin, conjugation with Boc-PEG<sub>3</sub>-OH, activation of  $\beta$ -carboxylate, and detaching/deprotecting the resin. The final heterodimer product QD-RGD-BBN was synthesized by conjugation of BocNH-PEG<sub>3</sub>-SuO-beta-Glu-RGD-BBN with QD-705 under mild condition and Boc group deprotection with TFA, and then purified by

preparative HPLC and lyophilized to afford QD-RGD-BBN as a white powder.

ESI-MS:  $(M + 3H)^{3+} = 700.8$ ; RP-HPLC:  $t_R = 12.6$  min (10%–80% MeCN/H<sub>2</sub>O; 20 min).



0.3 mg of QD-RGD-BBN in 0.2 mL of DMSO containing 20  $\mu$ L of diisopropylethylamine (DIPEA) was added to the reaction vessel with  $^{18}\text{F}$ -NFP and heated at 40°C for 5 min. At the end of the reaction, the reaction mixture was quenched by adding of 5% acetic acid (600  $\mu$ L) and diluted with water (10 mL), and the solution was passed through a Sep-Pak plus C18 cartridge.  $^{18}\text{F}$ -FP-QD-RGD-BBN was trapped on the C18 cartridge, and the cartridge was washed with 10 mL of water. Finally,  $^{18}\text{F}$ -FP-QD-RGD-BBN was eluted with 1 mL of ethanol into vial with 10 mL saline.

### ***In vivo* biodistribution**

The biodistribution study for  $^{18}\text{F}$ -FP-QD-RGD-BBN was performed in Kunming mice (body weight range 18-25 g). Mice were injected with 0.74 MBq (20  $\mu$ Ci) of  $^{18}\text{F}$ -FP-QD-RGD-BBN through the tail vein. Prescribed increments of time at 5, 30, 60, and 120 min postinjection were allowed before procurement of organs and tissues. Blood was obtained through mouse eyeball, and the other tissue samples of interest, including heart, brain, lung, liver, spleen, pancreas, kidneys, intestine, muscle, stomach, and bone, were rapidly dissected and weighed.  $^{18}\text{F}$  radioactivity was counted with an auto- $\gamma$  counter. All measurements were background-subtracted and decay-corrected to the time of injection. The results were calculated as percentage injected dose per gram tissue or organ (%ID/g) (n = 4).

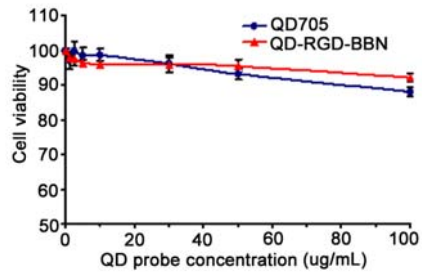

**SUPPLEMENTAL FIGURE 2.** Cytotoxicity of QD-RGD-BBN and QD705 at various concentrations.

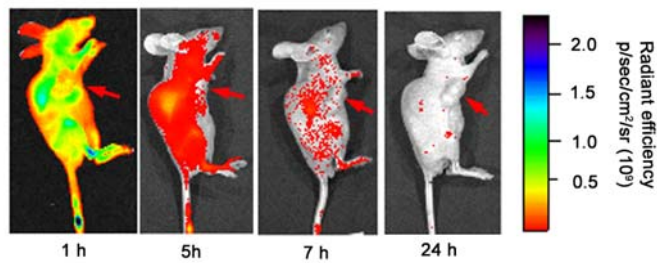

**SUPPLEMENTAL FIGURE 3.** In vivo NIRF imaging of PC-3 tumor-bearing mice at 1, 5, 7, and 24 h after injection of 200 pmol QD705.

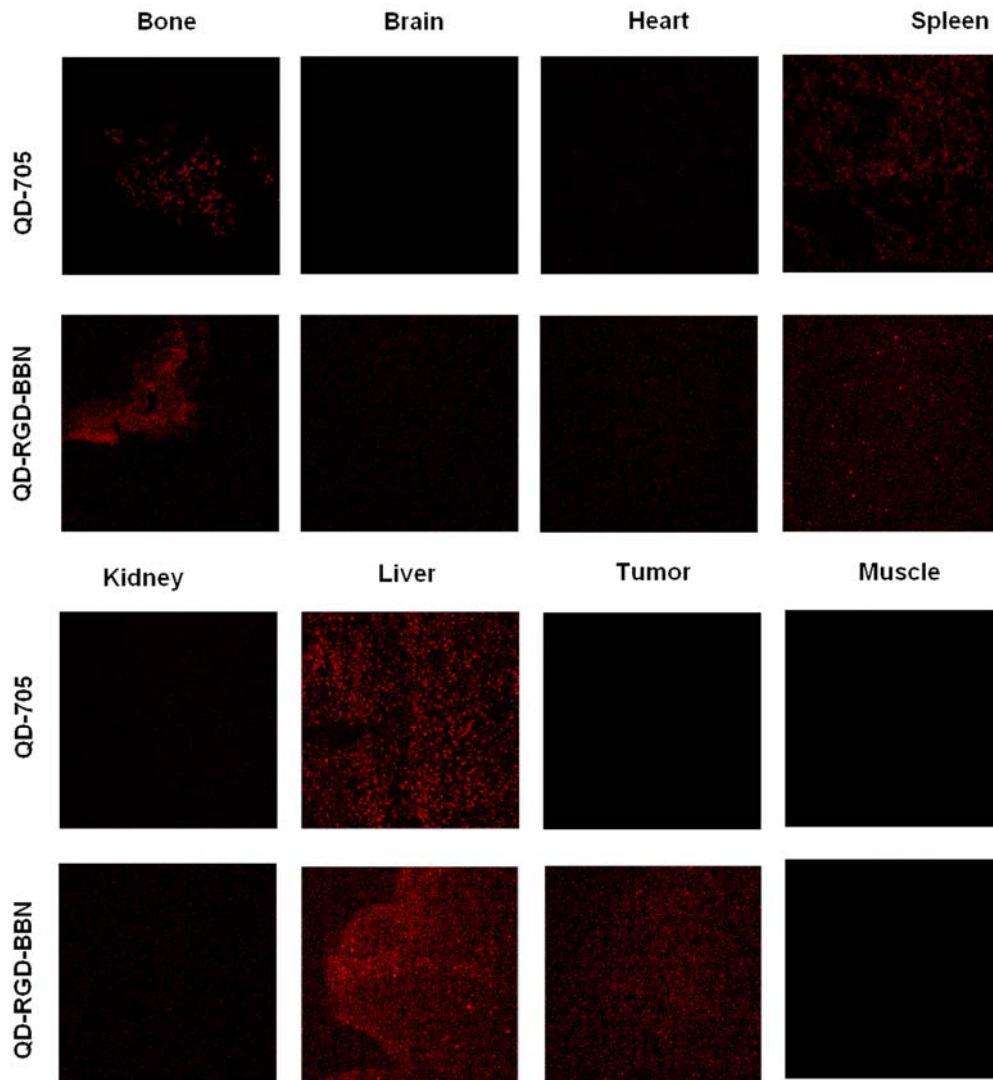

**SUPPLEMENTAL FIGURE 4.** QD-RGD-BBN (QD conjugated probe) and QD705 fluorescence images of frozen tissue slices (8  $\mu\text{m}$  thickness). All images were acquired under the same experimental condition. The fluorescence images of all the tissues were displayed at the same scale. Magnification, 200 $\times$ . Histological images of QD705 and QD conjugated probe in tissues. Excitation: 420 nm, Emission: 705/20 nm.

中山大学附属第一医院医学伦理委员会  
批复件

伦审[2013]A-173号

审议日期: 2013年2月28日

|      |                                   |                  |       |    |
|------|-----------------------------------|------------------|-------|----|
| 审议项目 | 肿瘤多靶点多功能量子点放射性标记分子探针的构建合成及其作用机理研究 |                  |       |    |
| 负责科室 | 核医学科                              | 项目负责人            | 唐刚华   |    |
| 出席委员 | 性别                                | 单位               | 专业    | 签名 |
| 余学涛  | 男                                 | 中山大学附属第一医院内科     | 医学    |    |
| 饶从志  | 男                                 | 中山大学附属第一医院科研处    | 科研管理  |    |
| 王长希  | 男                                 | 中山大学附属第一医院移植科    | 医学    |    |
| 王卓青  | 男                                 | 中山大学附属第一医院科研科    | 科研管理  |    |
| 苏乔   | 女                                 | 中山大学附属第一医院动物实验中心 | 兽医学   |    |
| 杨威   | 男                                 | 中山大学附属第一医院药学部    | 药学    |    |
| 张武军  | 男                                 | 中山大学附属第一医院医务科    | 医疗管理  |    |
| 金宇   | 女                                 | 中山大学公共卫生学院放射卫生系  | 应用心理学 |    |
| 蔡世荣  | 男                                 | 中山大学附属第一医院生医医学中心 | 医学    |    |
| 章海山  | 男                                 | 中山大学伦理学教研室       | 伦理学   |    |
| 蒋小云  | 女                                 | 中山大学附属第一医院儿科     | 医学    |    |
| 曾志荣  | 男                                 | 中山大学附属第一医院消化内科   | 医学    |    |
| 蔡世荣  | 男                                 | 中山大学附属第一医院胃肠外科   | 医学    |    |
| 蔡海宁  | 男                                 | 广东经纶律师事务所        | 律师    |    |

|            |                                                                                                                                                                                                                                                                                                                                                                                                                                                                                                                                   |
|------------|-----------------------------------------------------------------------------------------------------------------------------------------------------------------------------------------------------------------------------------------------------------------------------------------------------------------------------------------------------------------------------------------------------------------------------------------------------------------------------------------------------------------------------------|
| 已提交审阅的材料   | <ol style="list-style-type: none"> <li>1. 医学伦理委员会项目评审受理表</li> <li>2. 实验动物伦理审查申请书</li> <li>3. 技术路线图及动物伦理声明</li> <li>4. 动物实验岗位证书复印件</li> </ol>                                                                                                                                                                                                                                                                                                                                                                                      |
| 投票结果       | <ol style="list-style-type: none"> <li>1. 同意 (13) 人;</li> <li>2. 作必要的修改后同意 (0) 人;</li> <li>3. 修改后再报会议审议 (0) 人;</li> <li>4. 不同意 (0) 人;</li> <li>5. 终止或暂停先前已批准的试验 (0) 人。</li> </ol>                                                                                                                                                                                                                                                                                                                                                 |
| 医学伦理委员会意见: | <p>1. 经会议审议, 核医学科唐刚华提交的“肿瘤多靶点多功能量子点放射性标记分子探针的构建合成及其作用机理研究”, 符合医学伦理原则及道德要求, 同意研究者按本动物实验岗位证书复印件开展研究。</p> <p>2. 在研究过程中, 应遵守我国颁布的《实验动物管理条例》及科技部制定的《关于善待实验动物的指导性意见》与 GCP 等相关的伦理原则、道德标准及相关的法律、法规、常规、制度等。如对技术路线及动物伦理声明进行修改应及时向医学伦理委员会书面报告, 所涉及的伦理问题均应向医学伦理委员会再审议。</p> <p style="text-align: right;">主任委员 (签字): </p> <p style="text-align: right;">批复日期: 2013年2月28日</p> <p>声明: 本委员会仅对审查与备案的临床研究项目中涉及的伦理与道德问题负责。</p> <p>联系地址: 广州市中山二路 58 号, 中山大学附属第一医院医学伦理委员会, 邮编: 510080<br/>联系电话: 020-87334871, 020-87332200 转 8035 传真: 020-87333122</p> |

中山大学附属第一医院医学伦理委员会  
批复件

伦审[2012]001号

审议日期: 2012年1月12日

|      |                    |                  |      |    |
|------|--------------------|------------------|------|----|
| 审议项目 | 恶性肿瘤正电子发射断层显像新技术研究 |                  |      |    |
| 负责科室 | 核医学科               | 项目负责人            | 唐刚华  |    |
| 出席委员 | 性别                 | 单位               | 专业   | 签名 |
| 饶从志  | 男                  | 中山大学附属第一医院科研处    | 科研管理 |    |
| 王卓青  | 男                  | 中山大学附属第一医院科研科    | 科研管理 |    |
| 黎耀庭  | 女                  | 中山大学附属第一医院药学部    | 药学   |    |
| 王长希  | 男                  | 中山大学附属第一医院移植科    | 医学   |    |
| 苏乔   | 女                  | 中山大学附属第一医院外科实验中心 | 兽医学  |    |
| 蔡世荣  | 男                  | 中山大学附属第一医院胃肠外科   | 医学   |    |
| 曾志荣  | 男                  | 中山大学附属第一医院消化内科   | 医学   |    |
| 章海山  | 男                  | 中山大学伦理学教研室       | 伦理学  |    |
| 蔡海宁  | 男                  | 广东经纶律师事务所        | 律师   |    |

|            |                                                                                                                                                                                                                                                                                                                                                                                                                                                                                                                        |
|------------|------------------------------------------------------------------------------------------------------------------------------------------------------------------------------------------------------------------------------------------------------------------------------------------------------------------------------------------------------------------------------------------------------------------------------------------------------------------------------------------------------------------------|
| 已提交审阅的材料   | <ol style="list-style-type: none"> <li>1. 医学伦理委员会项目评审受理表</li> <li>2. 实验动物伦理审查申请书</li> <li>3. 研究方案</li> <li>4. 《放射性药品使用许可证》许可条件对照表</li> <li>5. 《放射性药品使用许可证》</li> <li>6. 动物实验岗位证书复印件</li> </ol>                                                                                                                                                                                                                                                                                                                          |
| 投票结果       | <ol style="list-style-type: none"> <li>1. 同意 (9) 人;</li> <li>2. 作必要的修改后同意 (0) 人;</li> <li>3. 修改后再报会议审议 (0) 人;</li> <li>4. 不同意 (0) 人;</li> <li>5. 终止或暂停先前已批准的试验 (0) 人。</li> </ol>                                                                                                                                                                                                                                                                                                                                       |
| 医学伦理委员会意见: | <p>1. 经会议审议, 核医学科唐刚华提交的“恶性肿瘤正电子发射断层显像新技术研究”, 符合医学伦理原则及道德要求, 同意研究者按本研究方案开展研究。</p> <p>2. 在研究过程中, 应遵守国际《赫尔辛基宣言》及我国卫生部门制定的《涉及人的生物医学研究伦理审查办法(试行)》与 GCP 等相关的伦理原则、道德标准及相关的法律、法规、常规、制度等。如对研究方案或知情同意书进行修改应及时向医学伦理委员会书面报告, 所涉及的伦理问题均应向医学伦理委员会再审议。</p> <p style="text-align: right;">主任委员 (签字): </p> <p style="text-align: right;">批复日期: 2012年1月12日</p> <p>声明: 本委员会仅对审查与备案的临床研究项目中涉及的伦理与道德问题负责。</p> <p>联系地址: 广州市中山二路 58 号, 中山大学附属第一医院医学伦理委员会, 邮编: 510080<br/>联系电话: 020-87333122, 020-87756766 转 9035, 80310; 传真: 020-87333122</p> |

**SUPPLEMENTAL FIGURE 5.** The original approval documents for animal experimental studies. Approval No. [2013]A-173 (top) and No. [2012]001 (bottom) were issued by Institutional Animal Care and Utilization Committee (IACUU) of the First Affiliated Hospital, Sun Yat-Sen University.
